# Supplementary material
Source: PubMed Central journal article supplement (PMC6951804)
Supplement: NIHMS1545652-supplement-1.pdf [file NIHMS1545652-supplement-1.pdf]

## Supplemental material

**Supplementary table S1. Overview of the three retrospective collections of NSCLCs used in this study**

| <b>Cohort</b>             | <b>Total number of tumors</b> | <b>Number of quantified tumors</b> | <b>Clinical annotation</b> | <b>Immunotherapy treated</b> | <b>Tumor genotype available</b> |
|---------------------------|-------------------------------|------------------------------------|----------------------------|------------------------------|---------------------------------|
| <b>Cohort 1 (YTMA250)</b> | 288                           | 258                                | Yes                        | No                           | No                              |
| <b>Cohort 2 (YTMA310)</b> | 138                           | 111                                | No                         | Unknown                      | Yes                             |
| <b>Cohort 3 (YTMA404)</b> | 81                            | 69                                 | Yes                        | Yes                          | Yes                             |
| <b>Total</b>              | 507                           | 438                                |                            |                              |                                 |

**Supplementary table S2. Panel for multiplexed CMTM6 and PD-L1 immunofluorescence staining**

|                             | <b>Cytokeratin</b>                                              | <b>CD68</b>                                                                                 | <b>CMTM6</b>                                                          | <b>PDL1</b>                                                                |
|-----------------------------|-----------------------------------------------------------------|---------------------------------------------------------------------------------------------|-----------------------------------------------------------------------|----------------------------------------------------------------------------|
| <b>Primary antibodies</b>   | Rabbit polyclonal (Agilent) 1/100, 1 hour incubation            | Clone PG-M1 (mouse IgG3, Abcam), 1 ug/ml, 4°C overnight incubation                          | Clone RCT6 (mouse IgG1, Absea), 0.4 ug/ml, 4°C overnight incubation   | Clone E1L3N (rabbit IgG, Cell Signaling), 1 ug/ml, 4° overnight incubation |
| <b>Secondary antibodies</b> | Anti-rabbit Alexa488 (Invitrogen), 1/100, 1 hour incubation, RT | Anti-mouse IgG3 (ab97260, Abcam), 1/1000, 1 hour incubation, RT                             | Anti-mouse IgG1 (M1-14D12, eBioscience), 1/100, 1 hour incubation, RT | Anti-rabbit EnVision (K4009, Agilent), 1 hour incubation, RT               |
| <b>Fluorescent reagents</b> |                                                                 | Biotynilated tyramid/Streptavidine-Alexa750 conjugate (Perkin-Elmer), 1 hour incubation, RT | Cy3+-tyramide (Perkin-Elmer), 10 min incubation, RT                   | Cy5-tyramide (Perkin-Elmer), 10 min incubation, RT                         |
| <b>Counterstain</b>         | DAPI, 1/1000, 5 min incubation, RT                              |                                                                                             |                                                                       |                                                                            |

**Supplementary table S3. Panel for multiplexed TILs immunofluorescence staining**

|                             | <b>Cytokeratin</b>                                                    | <b>CD8</b>                                                             | <b>CD4</b>                                                                                  | <b>CD20</b>                                                        |
|-----------------------------|-----------------------------------------------------------------------|------------------------------------------------------------------------|---------------------------------------------------------------------------------------------|--------------------------------------------------------------------|
| <b>Primary antibodies</b>   | Clone Z0622 (rabbit IgG, Agilent) 1/100, 1 hour incubation            | Clone C8/144B (mouse IgG1, Agilent), 1 ug/ml, 4°C overnight incubation | Clone SP35 (rabbit IgG, Spring Bioscience), 1 ug/ml, 4°C overnight incubation               | Clone L26 (Mouse IgG2a, Agilent), 1 ug/ml, 4° overnight incubation |
| <b>Secondary antibodies</b> | Anti-rabbit Alexa456 (Molecular Probes), 1/100, 1 hour incubation, RT | Anti-mouse IgG1 (M1-14D12, eBioscience), 1/100, 1 hour incubation, RT  | Anti-rabbit envision (K4009, Agilent), 1 hour incubation, RT                                | Anti-mouse IgG2 (, Abcam), 1/200, 1 hour incubation, RT            |
| <b>Fluorescent reagents</b> |                                                                       | Fluorescein-tyramide (Perkin-Elmer), 10 min incubation, RT             | Biotynilated tyramid/Streptavidine-Alexa750 conjugate (Perkin-Elmer), 1 hour incubation, RT | Cy5-tyramide (Perkin-Elmer), 10 min incubation, RT                 |
| <b>Counterstain</b>         | DAPI, 1/1000, 5 min incubation, RT                                    |                                                                        |                                                                                             |                                                                    |

**Supplementary table S4. CMTM6 expression in the tumor compartment and clinicopathological characteristics in two independent NSCLC cohorts**

| Characteristic              | YTMA404 cohort |            |         | YTMA250 cohort |            |         |
|-----------------------------|----------------|------------|---------|----------------|------------|---------|
|                             | CMTM6 low      | CMTM6 high | p value | CMTM6 low      | CMTM6 high | p value |
| <b>Gender</b>               |                |            |         |                |            |         |
| Male                        | 16             | 22         | 0.18    | 50             | 656        | 0.62    |
| Female                      | 18             | 13         |         | 66             | 65         |         |
| <b>Age</b>                  |                |            |         |                |            |         |
| < 70 yo                     | 15             | 20         | 0.27    | 65             | 67         | 0.97    |
| >= 70 yo                    | 19             | 15         |         | 51             | 53         |         |
| <b>ECOG</b>                 |                |            |         |                |            |         |
| 0                           | 2              | 4          | 0.29    |                |            |         |
| 1                           | 26             | 28         |         |                |            |         |
| 2                           | 6              | 2          |         |                |            |         |
| 3                           | 0              | 1          |         |                |            |         |
| <b>Smoking history</b>      |                |            |         |                |            |         |
| Never smoker                | 6              | 7          | 0.78    | 23             | 15         | 0.24    |
| Current smoker              | 8              | 8          |         | 27             | 35         |         |
| Former smoker               | 19             | 20         |         | 58             | 63         |         |
| <b>Histology</b>            |                |            |         |                |            |         |
| Adenocarcinoma              | 27             | 23         | 0.52    | 77             | 58         | 0.02    |
| Squamous-cell carcinoma     | 6              | 9          |         | 24             | 39         |         |
| Large-cell carcinoma        | 1              | 2          |         | 3              | 9          |         |
| Others                      | 0              | 1          |         | 11             | 13         |         |
| <b>Stage</b>                |                |            |         |                |            |         |
| I                           |                |            | 0.52    | 75             | 72         | 0.46    |
| II                          |                |            |         | 22             | 23         |         |
| III                         | 2              | 0          |         | 11             | 19         |         |
| IV (M1a)                    | 8              | 10         |         | 6              | 4          |         |
| IV (M1b)                    | 5              | 5          |         |                |            |         |
| IV (M1c)                    | 19             | 20         |         |                |            |         |
| <b>EGFR mutation status</b> |                |            |         |                |            |         |
| Wild type                   | 22             | 22         | 0.36    |                |            |         |
| Mutant                      | 6              | 3          |         |                |            |         |
| <b>KRAS mutation status</b> |                |            |         |                |            |         |
| Wild type                   | 15             | 17         | 0.08    |                |            |         |
| Mutant                      | 13             | 5          |         |                |            |         |
| <b>CNS metastasis</b>       |                |            |         |                |            |         |
| No                          | 26             | 24         | 0.58    |                |            |         |
| Yes                         | 8              | 10         |         |                |            |         |
| <b>Liver metastasis</b>     |                |            |         |                |            |         |
| No                          | 28             | 28         | 1.00    |                |            |         |
| Yes                         | 6              | 6          |         |                |            |         |
| <b>LPI score</b>            |                |            |         |                |            |         |
| Good                        | 16             | 12         | 0.72    |                |            |         |
| Intermediate                | 12             | 14         |         |                |            |         |
| Poor                        | 2              | 2          |         |                |            |         |

**Supplementary table S5. CMTM6 expression in the stromal compartment and clinical-pathological characteristics in two independent NSCLC cohorts**

| Characteristic              | YTMA404 cohort |            |         | YTMA250 cohort |            |         |
|-----------------------------|----------------|------------|---------|----------------|------------|---------|
|                             | CMTM6 low      | CMTM6 high | p value | CMTM6 low      | CMTM6 high | p value |
| <b>Gender</b>               |                |            |         |                |            |         |
| Male                        | 19             | 19         | 0.89    | 53             | 53         | 0.77    |
| Female                      | 15             | 16         |         | 63             | 68         |         |
| <b>Age</b>                  |                |            |         |                |            |         |
| < 70 yo                     | 16             | 19         | 0.54    | 60             | 72         | 0.15    |
| >= 70 yo                    | 18             | 16         |         | 57             | 47         |         |
| <b>ECOG</b>                 |                |            |         |                |            |         |
| 0                           | 3              | 3          | 0.80    |                |            |         |
| 1                           | 27             | 27         |         |                |            |         |
| 2                           | 4              | 4          |         |                |            |         |
| 3                           | 0              | 1          |         |                |            |         |
| <b>Smoking history</b>      |                |            |         |                |            |         |
| Never smoker                | 5              | 8          | 0.63    | 21             | 17         | 0.52    |
| Current smoker              | 8              | 8          |         | 27             | 35         |         |
| Former smoker               | 20             | 19         |         | 59             | 62         |         |
| <b>Histology</b>            |                |            |         |                |            |         |
| Adenocarcinoma              | 25             | 25         | 0.70    | 71             | 64         | 0.45    |
| Squamous-cell carcinoma     | 8              | 7          |         | 28             | 35         |         |
| Large-cell carcinoma        | 1              | 2          |         | 4              | 8          |         |
| Others                      | 0              | 1          |         | 13             | 11         |         |
| <b>Stage</b>                |                |            |         |                |            |         |
| I                           |                |            | 0.38    | 77             | 70         | 0.50    |
| II                          |                |            |         | 19             | 26         |         |
| III                         | 2              | 0          |         | 13             | 17         |         |
| IV (M1a)                    | 9              | 9          |         | 6              | 4          |         |
| IV (M1b)                    | 6              | 4          |         |                |            |         |
| IV (M1c)                    | 17             | 22         |         |                |            |         |
| <b>EGFR mutation status</b> |                |            |         |                |            |         |
| Wild type                   | 22             | 22         | 0.76    |                |            |         |
| Mutant                      | 4              | 5          |         |                |            |         |
| <b>KRAS mutation status</b> |                |            |         |                |            |         |
| Wild type                   | 14             | 18         | 0.42    |                |            |         |
| Mutant                      | 10             | 8          |         |                |            |         |
| <b>CNS metastasis</b>       |                |            |         |                |            |         |
| No                          | 28             | 22         | 0.04    |                |            |         |
| Yes                         | 5              | 13         |         |                |            |         |
| <b>Liver metastasis</b>     |                |            |         |                |            |         |
| No                          | 26             | 30         | 0.45    |                |            |         |
| Yes                         | 7              | 5          |         |                |            |         |
| <b>LPI score</b>            |                |            |         |                |            |         |
| Good                        | 15             | 13         | 0.53    |                |            |         |
| Intermediate                | 10             | 16         |         |                |            |         |
| Poor                        | 2              | 2          |         |                |            |         |

**Supplementary table S6. Objective response rates according to CMTM6 expression**

|              | CMTM6 in the tumor compartment |              |              | CMTM6 in the stromal compartment |              |            | CMTM6 in the CD68 compartment |              |              |         |
|--------------|--------------------------------|--------------|--------------|----------------------------------|--------------|------------|-------------------------------|--------------|--------------|---------|
|              | N                              | Low (%)      | High (%)     | p value                          | Low (%)      | High (%)   | p value                       | Low (%)      | High (%)     | p value |
| <b>PR</b>    | 8<br>(14.8)                    | 3<br>(10.7)  | 5<br>(19.2)  | 0.37                             | 2<br>(6.9)   | 6<br>(24)  | 0.078                         | 2<br>(7.7)   | 6<br>(21.4)  | 0.15    |
| <b>SD+PD</b> | 46<br>(85.2)                   | 25<br>(89.3) | 21<br>(80.8) |                                  | 27<br>(93.1) | 19<br>(76) |                               | 24<br>(92.3) | 22<br>(78.6) |         |

PR: partial response; SD: stable disease; PD: progressive disease

**Supplementary table S7. Objective response rates according to PD-L1 expression**

|              | PDL1 in the tumor compartment |              |              | p value | PDL1 in the stromal compartment |              |         | p value      | PDL1 in the CD68 compartment |      |  |
|--------------|-------------------------------|--------------|--------------|---------|---------------------------------|--------------|---------|--------------|------------------------------|------|--|
|              | N (%)                         | Low (%)      | High (%)     |         | Low (%)                         | High (%)     | Low (%) |              | High (%)                     |      |  |
| <b>PR</b>    | 8<br>(14.8)                   | 3<br>(11.1)  | 5<br>(18.5)  | 0.44    | 1<br>(3.6)                      | 7<br>(26.9)  | 0.016   | 2<br>(7.4)   | 6<br>(22.2)                  | 0.12 |  |
| <b>SD+PD</b> | 46<br>(85.2)                  | 24<br>(88.9) | 22<br>(81.5) |         | 27<br>(96.4)                    | 19<br>(73.1) |         | 25<br>(92.6) | 21<br>(77.8)                 |      |  |

PR: partial response; SD: stable disease; PD: progressive disease

**Supplementary table S8. Objective response rates according to CMTM6/PD-L1 co-expression subgroups**

|              | <b>CMTM6 AND PDL1<br/>in the tumor compartment</b> |              |                    |         | <b>CMTM6 AND PDL1<br/>in the stromal compartment</b> |                    |         |              | <b>CMTM6 AND PDL1<br/>in the CD68 compartment</b> |         |  |  |
|--------------|----------------------------------------------------|--------------|--------------------|---------|------------------------------------------------------|--------------------|---------|--------------|---------------------------------------------------|---------|--|--|
|              | N                                                  | Rest<br>(%)  | Double High<br>(%) | p value | Rest<br>(%)                                          | Double High<br>(%) | p value | Rest<br>(%)  | Double High<br>(%)                                | p value |  |  |
| <b>PR</b>    | 8<br>(14.8)                                        | 4<br>(11.1)  | 4<br>(22.2)        | 0.27    | 2<br>(5.6)                                           | 6<br>(33.3)        | 0.007   | 3<br>(8.1)   | 5<br>(29.4)                                       | 0.041   |  |  |
| <b>SD+PD</b> | 46<br>(85.2)                                       | 32<br>(88.9) | 14<br>(77.8)       |         | 34<br>(94.4)                                         | 12<br>(66.7)       |         | 34<br>(91.9) | 12<br>(70.6)                                      |         |  |  |

PR: partial response; SD: stable disease; PD: progressive disease



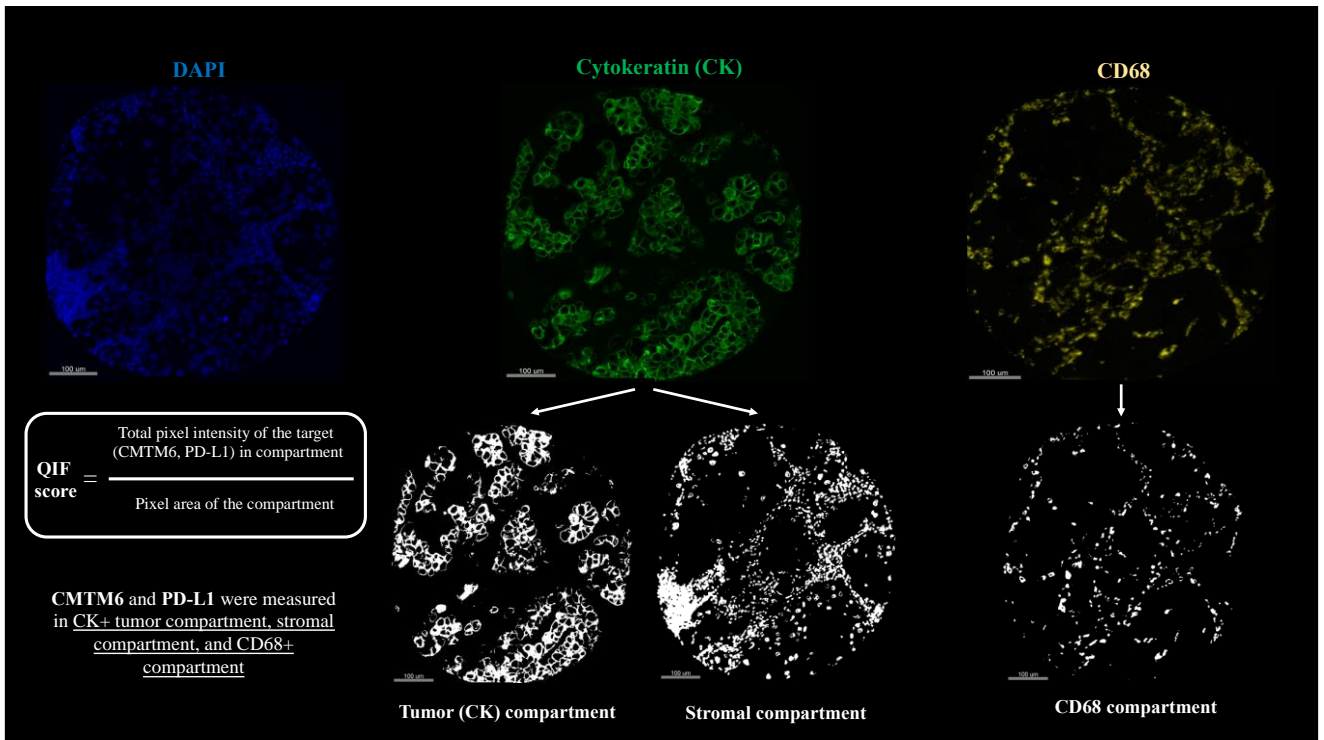

QIF: quantitative immunofluorescence

**Supplementary figure S1. Representative image showing tissue compartmentalization and target quantification using the AQUA software**

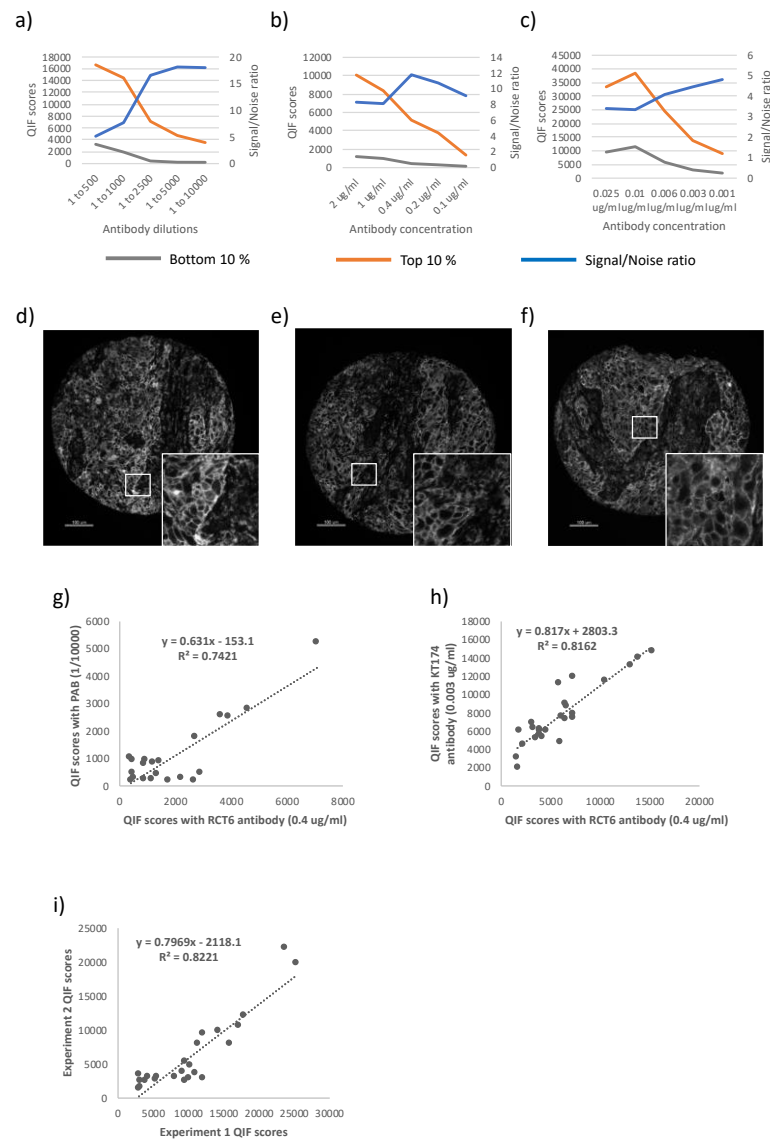

**Supplementary figure S2.** Validation of anti-CMTM6 antibody clone RCT6. (a)-(c) Titration curves of three different anti-CMTM6 antibodies used for assay validation plotted at five different concentrations: polyclonal antibody (ab198284) (a), monoclonal antibody clone RCT6 (b), and monoclonal antibody clone KT174 (c); (d)-(f) Representative membranous CMTM6 staining pattern with anti-CMTM6 polyclonal antibody (ab198284) (d), anti-CMTM6 monoclonal antibody clone RCT6 (e) and anti-CMTM6 monoclonal antibody clone KT174 (f). (g)-(h) Cross validation of anti-CMTM6 antibody clone RCT6 to the anti-CMTM6 polyclonal antibody (ab198284) (g) and to a second anti-CMTM6 monoclonal antibody (clone KT174) targeting non-overlapping epitopes (h). (i) Reproducibility of CMTM6 measurement with clone RCT6 in two independent multiplexed experiment

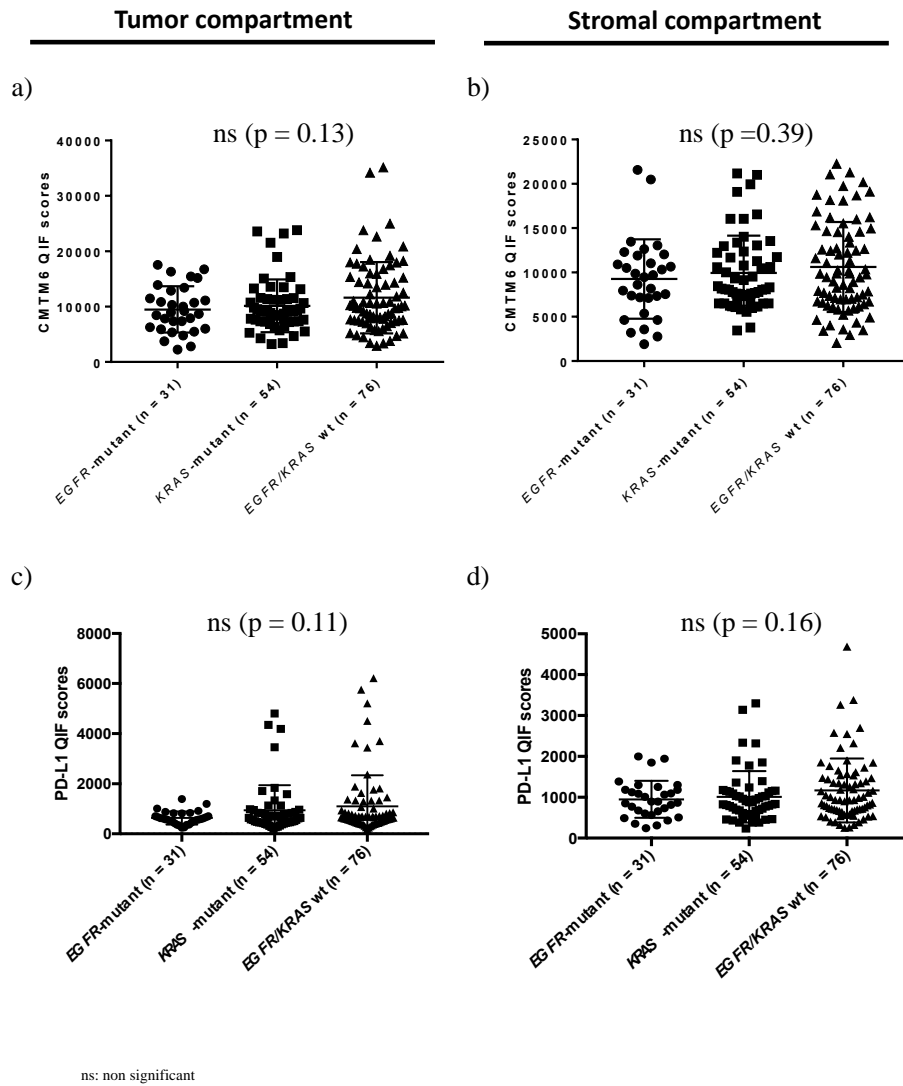

**Supplementary figure S3.** CMTM6 and PD-L1 expression levels in the tumor compartment (a and c, respectively) and the stromal compartment (b and d, respectively) in *EGFR*- and *KRAS*-mutant NSCLCs (YTMA310 and YTMA404 cohorts combined)

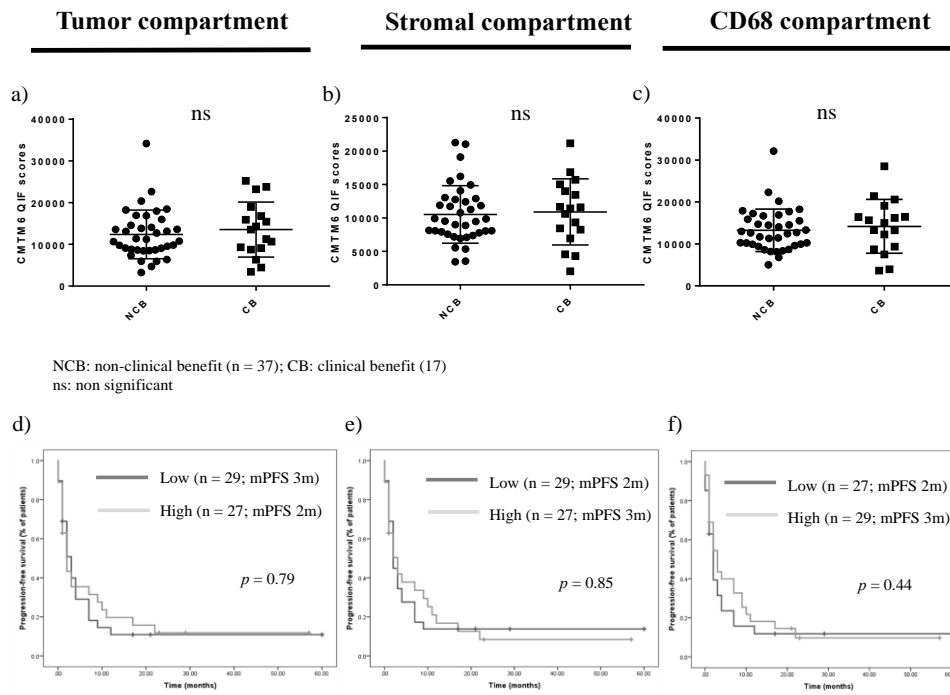

**Supplementary figure S4.** CMTM6 expression levels according to clinical benefit subgroups in the tumor compartment (a), the stromal compartment (b), and the CD68 compartment (c). PFS under PD-1 axis blockade according to CMTM6 expression in the tumor compartment (d), the stromal compartment (e), and the CD68 compartment (f)

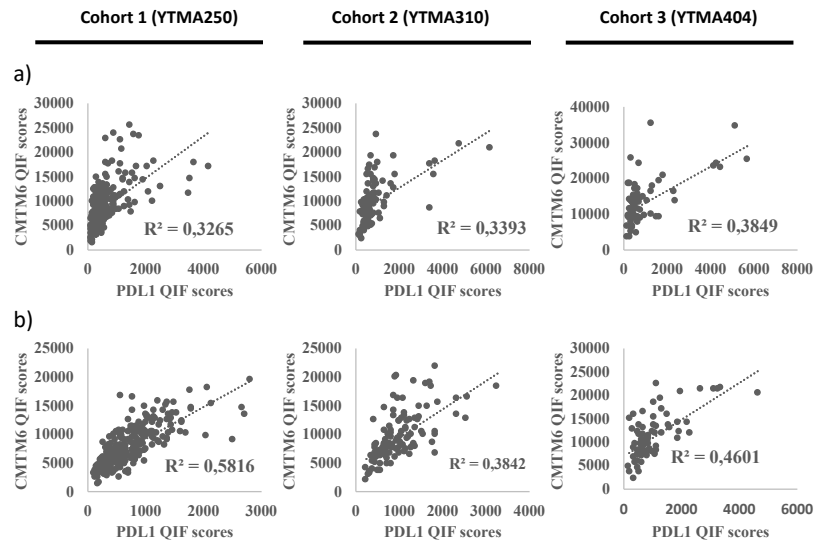

**Supplementary figure S5.** Correlation between CMTM6 and PDL1 expression levels in the tumor compartment (a) and the stromal compartment (b) in the three tested cohorts separately

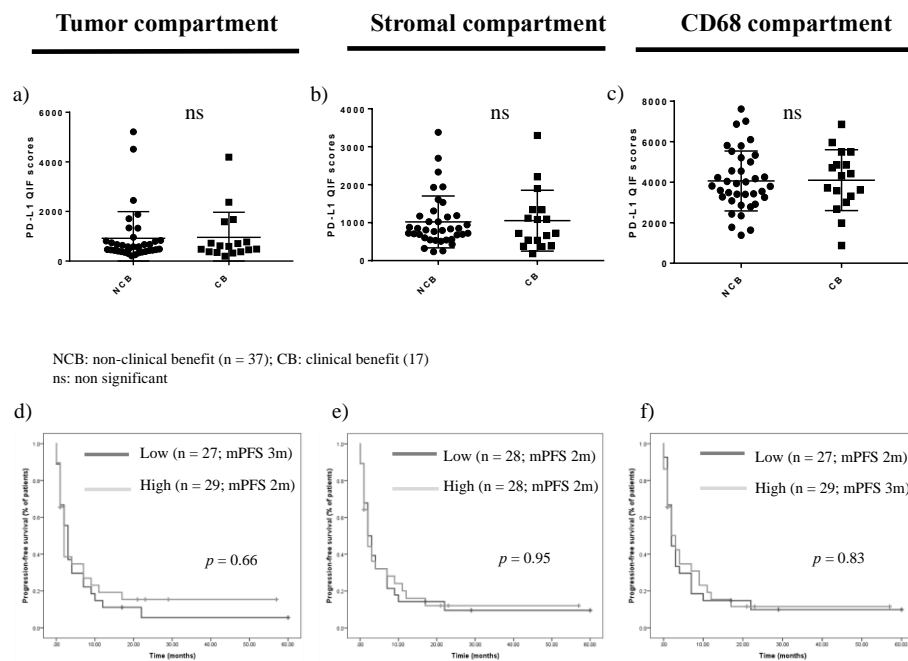

**Supplementary figure S6.** PD-L1 expression levels according to clinical benefit subgroups in the tumor compartment (a), the stromal compartment (b), and the CD68 compartment (c). PFS under PD-1 axis blockade according to PD-L1 expression in the tumor compartment (d), the stromal compartment (e), and the CD68 compartment (f)

## Immunotherapy treated cohort (YTMA404)

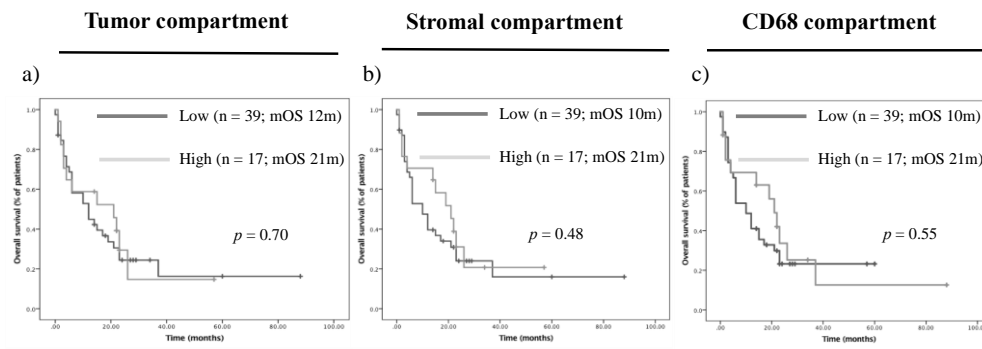

**Supplementary figure S7.** OS under PD-1 axis blockade in patients in the top 30<sup>th</sup> percentile of PD-L1 expression in the tumor compartment (a), the stromal compartment (b), and the CD68 compartment (c)

DAPI/CMTM6/PD-L1

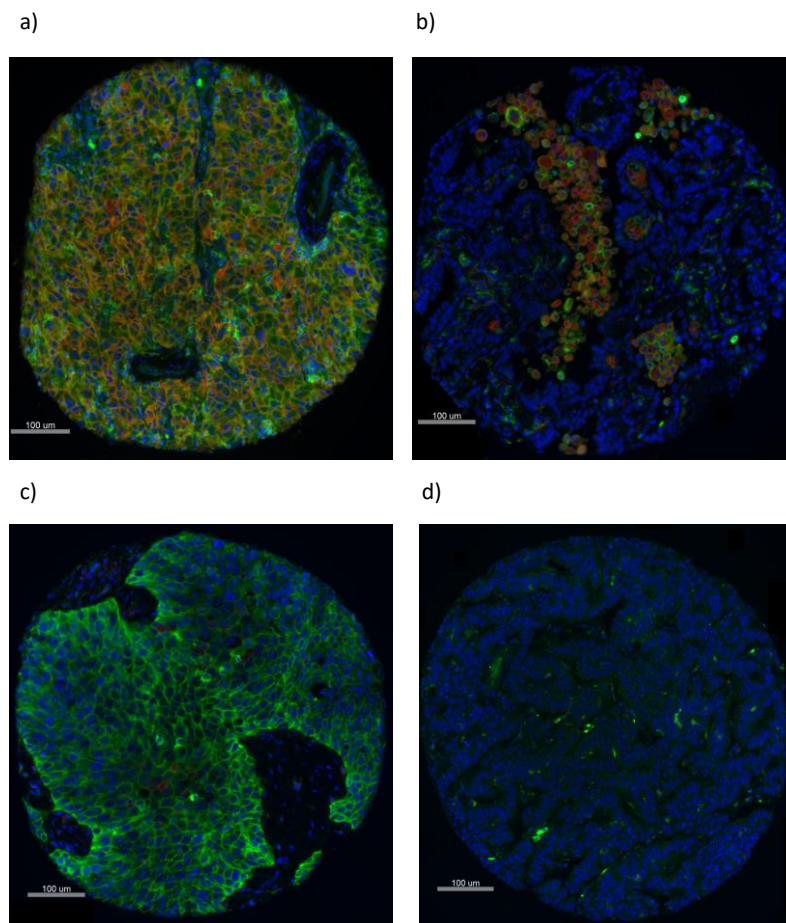

**Supplementary figure S8.** Representative images showing CMTM6 and PD-L1 co-expression phenotypes in NSCLC: (a) CMTM6 high / PD-L1 high; (b) CMTM6 low / PD-L1 high; (c) CMTM6 high / PD-L1 low; (d) CMTM6 low / PD-L1 low



## Immunotherapy treated cohort (YTMA404)

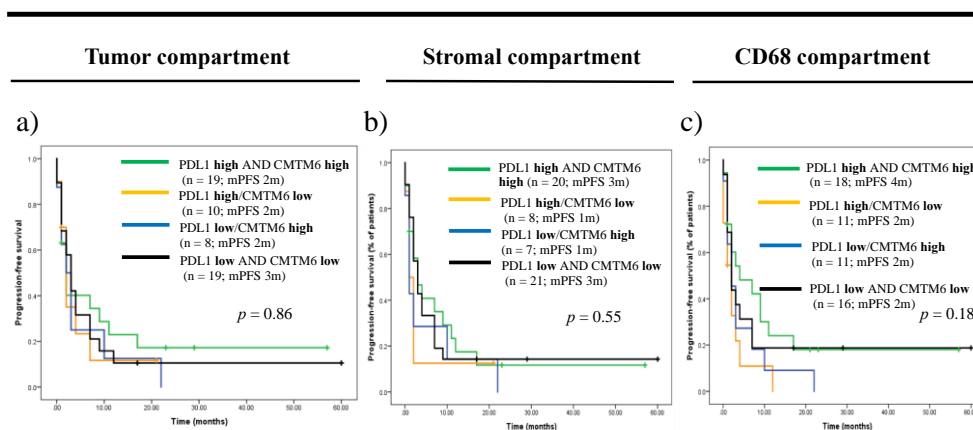

**Supplementary figure S9.** PFS under PD-1 axis blockade in the four CMTM6/PD-L1 co-expression phenotypes

### Immunotherapy treated cohort (YTMA404)

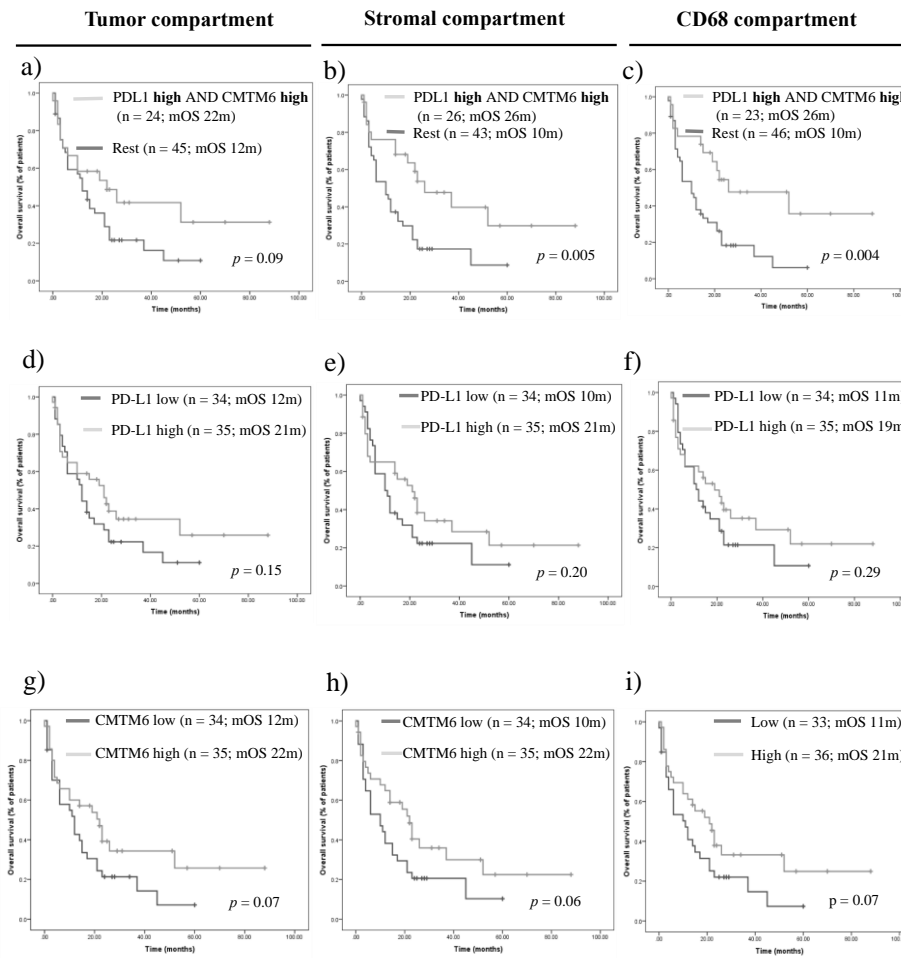

**Supplementary figure S10.** Indicative performance of high CMTM6 and PD-L1 in the full immunotherapy-treated patient cohort (n = 69). (a)-(c) OS in patients with high CMTM6 and PD-L1 co-expression in the tumor compartment (a), the stromal compartment (b), and the CD68 compartment (c); (d)-(f) OS according to PD-L1 expression in the tumor compartment (d), the stromal compartment (e), and the CD68 compartment (f); (g)-(i) OS according to CMTM6 expression in the tumor compartment (g), the stromal compartment (h), and the CD68 compartment

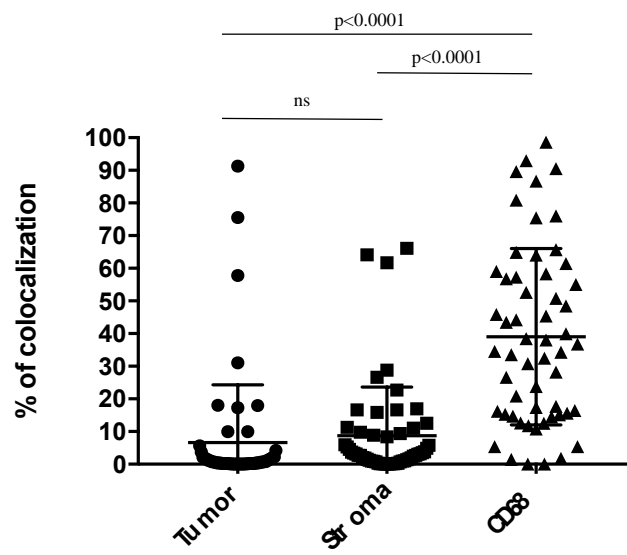

**Supplementary figure S11.** Percentage of CMTM6 and PD-L1 pixel co-localization in the tumor, stroma, and CD68 compartments

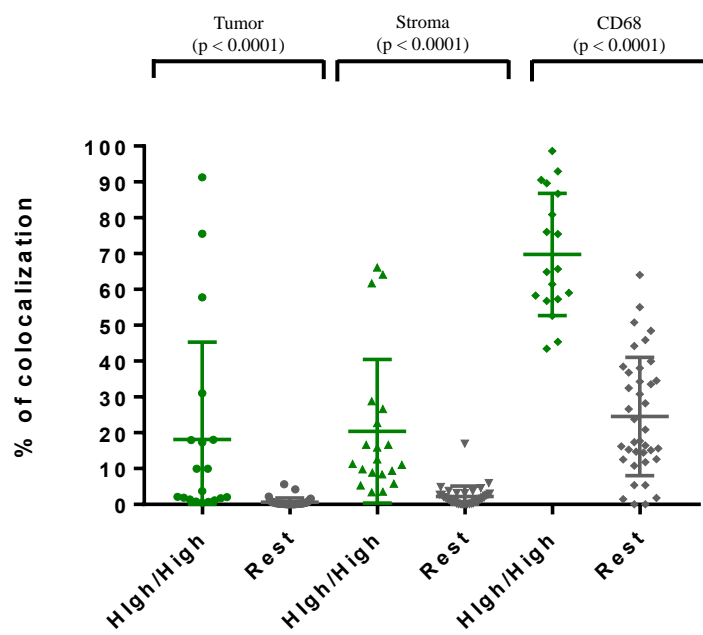

**Supplementary figure S12.** Percentage of CMTM6 and PD-L1 colocalization in the tumor, stroma and CD68 compartments in tumors with high expression of CMTM6 and PD-L1 compared to the rest of the three tumor phenotypes combined
