# Supplementary material
Source: PubMed Central journal article supplement (PMC6951804)
Supplement: NIHMS1545652-supplement-2.pdf [file NIHMS1545652-supplement-2.pdf]

## Supplemental material

**Supplementary table S1. Overview of the three retrospective collections on NSCLCs used in this study**

| <b>Cohort</b>             | <b>Total number of tumors</b> | <b>Number of quantified tumors</b> | <b>Clinical annotation</b> | <b>Immunotherapy treated</b> | <b>Tumor genotype available</b> |
|---------------------------|-------------------------------|------------------------------------|----------------------------|------------------------------|---------------------------------|
| <b>Cohort 1 (YTMA250)</b> | 288                           | 258                                | Yes                        | No                           | No                              |
| <b>Cohort 2 (YTMA310)</b> | 138                           | 111                                | No                         | Unknown                      | Yes                             |
| <b>Cohort 3 (YTMA404)</b> | 81                            | 69                                 | Yes                        | Yes                          | Yes                             |
| <b>Total</b>              | 507                           | 438                                |                            |                              |                                 |

**Supplementary table S2. Panel for multiplexed CMTM6 and PD-L1 immunofluorescence staining**

|                             | <b>Cytokeratin</b>                                              | <b>CD68</b>                                                                                 | <b>CMTM6</b>                                                          | <b>PDL1</b>                                                                |
|-----------------------------|-----------------------------------------------------------------|---------------------------------------------------------------------------------------------|-----------------------------------------------------------------------|----------------------------------------------------------------------------|
| <b>Primary antibodies</b>   | Rabbit polyclonal (Agilent) 1/100, 1 hour incubation            | Clone PG-M1 (mouse IgG3, Abcam), 1 ug/ml, 4°C overnight incubation                          | Clone RCT6 (mouse IgG1, Absea), 0.4 ug/ml, 4°C overnight incubation   | Clone E1L3N (rabbit IgG, Cell Signaling), 1 ug/ml, 4° overnight incubation |
| <b>Secondary antibodies</b> | Anti-rabbit Alexa488 (Invitrogen), 1/100, 1 hour incubation, RT | Anti-mouse IgG3 (ab97260, Abcam), 1/1000, 1 hour incubation, RT                             | Anti-mouse IgG1 (M1-14D12, eBioscience), 1/100, 1 hour incubation, RT | Anti-rabbit EnVision (K4009, Agilent), 1 hour incubation, RT               |
| <b>Fluorescent reagents</b> |                                                                 | Biotynilated tyramid/Streptavidine-Alexa750 conjugate (Perkin-Elmer), 1 hour incubation, RT | Cy3+-tyramide (Perkin-Elmer), 10 min incubation, RT                   | Cy5-tyramide (Perkin-Elmer), 10 min incubation, RT                         |
| <b>Counterstain</b>         | DAPI, 1/1000, 5 min incubation, RT                              |                                                                                             |                                                                       |                                                                            |

**Supplementary table S3. Panel for multiplexed TILs immunofluorescence staining**

|                             | <b>Cytokeratin</b>                                                    | <b>CD8</b>                                                             | <b>CD4</b>                                                                                  | <b>CD20</b>                                                        |
|-----------------------------|-----------------------------------------------------------------------|------------------------------------------------------------------------|---------------------------------------------------------------------------------------------|--------------------------------------------------------------------|
| <b>Primary antibodies</b>   | Clone Z0622 (rabbit IgG, Agilent) 1/100, 1 hour incubation            | Clone C8/144B (mouse IgG1, Agilent), 1 ug/ml, 4°C overnight incubation | Clone SP35 (rabbit IgG, Spring Bioscience), 1 ug/ml, 4°C overnight incubation               | Clone L26 (Mouse IgG2a, Agilent), 1 ug/ml, 4° overnight incubation |
| <b>Secondary antibodies</b> | Anti-rabbit Alexa456 (Molecular Probes), 1/100, 1 hour incubation, RT | Anti-mouse IgG1 (M1-14D12, eBioscience), 1/100, 1 hour incubation, RT  | Anti-rabbit envision (K4009, Agilent), 1 hour incubation, RT                                | Anti-mouse IgG2 (, Abcam), 1/200, 1 hour incubation, RT            |
| <b>Fluorescent reagents</b> |                                                                       | Fluorescein-tyramide (Perkin-Elmer), 10 min incubation, RT             | Biotynilated tyramid/Streptavidine-Alexa750 conjugate (Perkin-Elmer), 1 hour incubation, RT | Cy5-tyramide (Perkin-Elmer), 10 min incubation, RT                 |
| <b>Counterstain</b>         | DAPI, 1/1000, 5 min incubation, RT                                    |                                                                        |                                                                                             |                                                                    |

**Supplementary table S4. CMTM6 expression in the tumor compartment and clinicopathological characteristics in two independent NSCLC cohorts**

| Characteristic              | YTMA404 cohort |            |         | YTMA250 cohort |            |         |
|-----------------------------|----------------|------------|---------|----------------|------------|---------|
|                             | CMTM6 low      | CMTM6 high | p value | CMTM6 low      | CMTM6 high | p value |
| <b>Gender</b>               |                |            |         |                |            |         |
| Male                        | 16             | 22         | 0.18    | 50             | 656        | 0.62    |
| Female                      | 18             | 13         |         | 66             | 65         |         |
| <b>Age</b>                  |                |            |         |                |            |         |
| < 70 yo                     | 15             | 20         | 0.27    | 65             | 67         | 0.97    |
| >= 70 yo                    | 19             | 15         |         | 51             | 53         |         |
| <b>ECOG</b>                 |                |            |         |                |            |         |
| 0                           | 2              | 4          | 0.29    |                |            |         |
| 1                           | 26             | 28         |         |                |            |         |
| 2                           | 6              | 2          |         |                |            |         |
| 3                           | 0              | 1          |         |                |            |         |
| <b>Smoking history</b>      |                |            |         |                |            |         |
| Never smoker                | 6              | 7          | 0.78    | 23             | 15         | 0.24    |
| Current smoker              | 8              | 8          |         | 27             | 35         |         |
| Former smoker               | 19             | 20         |         | 58             | 63         |         |
| <b>Histology</b>            |                |            |         |                |            |         |
| Adenocarcinoma              | 27             | 23         | 0.52    | 77             | 58         | 0.02    |
| Squamous-cell carcinoma     | 6              | 9          |         | 24             | 39         |         |
| Large-cell carcinoma        | 1              | 2          |         | 3              | 9          |         |
| Others                      | 0              | 1          |         | 11             | 13         |         |
| <b>Stage</b>                |                |            |         |                |            |         |
| I                           |                |            | 0.52    | 75             | 72         | 0.46    |
| II                          |                |            |         | 22             | 23         |         |
| III                         | 2              | 0          |         | 11             | 19         |         |
| IV (M1a)                    | 8              | 10         |         | 6              | 4          |         |
| IV (M1b)                    | 5              | 5          |         |                |            |         |
| IV (M1c)                    | 19             | 20         |         |                |            |         |
| <b>EGFR mutation status</b> |                |            |         |                |            |         |
| Wild type                   | 22             | 22         | 0.36    |                |            |         |
| Mutant                      | 6              | 3          |         |                |            |         |
| <b>KRAS mutation status</b> |                |            |         |                |            |         |
| Wild type                   | 15             | 17         | 0.08    |                |            |         |
| Mutant                      | 13             | 5          |         |                |            |         |
| <b>CNS metastasis</b>       |                |            |         |                |            |         |
| No                          | 26             | 24         | 0.58    |                |            |         |
| Yes                         | 8              | 10         |         |                |            |         |
| <b>Liver metastasis</b>     |                |            |         |                |            |         |
| No                          | 28             | 28         | 1.00    |                |            |         |
| Yes                         | 6              | 6          |         |                |            |         |
| <b>LIPI score</b>           |                |            |         |                |            |         |
| Good                        | 16             | 12         | 0.72    |                |            |         |
| Intermediate                | 12             | 14         |         |                |            |         |
| Poor                        | 2              | 2          |         |                |            |         |

**Supplementary table S5. CMTM6 expression in the stromal compartment and clinical-pathological characteristics in two independent NSCLC cohorts**

| Characteristic              | YTMA404 cohort |            |         | YTMA250 cohort |            |         |
|-----------------------------|----------------|------------|---------|----------------|------------|---------|
|                             | CMTM6 low      | CMTM6 high | p value | CMTM6 low      | CMTM6 high | p value |
| <b>Gender</b>               |                |            |         |                |            |         |
| Male                        | 19             | 19         | 0.89    | 53             | 53         | 0.77    |
| Female                      | 15             | 16         |         | 63             | 68         |         |
| <b>Age</b>                  |                |            |         |                |            |         |
| < 70 yo                     | 16             | 19         | 0.54    | 60             | 72         | 0.15    |
| >= 70 yo                    | 18             | 16         |         | 57             | 47         |         |
| <b>ECOG</b>                 |                |            |         |                |            |         |
| 0                           | 3              | 3          | 0.80    |                |            |         |
| 1                           | 27             | 27         |         |                |            |         |
| 2                           | 4              | 4          |         |                |            |         |
| 3                           | 0              | 1          |         |                |            |         |
| <b>Smoking history</b>      |                |            |         |                |            |         |
| Never smoker                | 5              | 8          | 0.63    | 21             | 17         | 0.52    |
| Current smoker              | 8              | 8          |         | 27             | 35         |         |
| Former smoker               | 20             | 19         |         | 59             | 62         |         |
| <b>Histology</b>            |                |            |         |                |            |         |
| Adenocarcinoma              | 25             | 25         | 0.70    | 71             | 64         | 0.45    |
| Squamous-cell carcinoma     | 8              | 7          |         | 28             | 35         |         |
| Large-cell carcinoma        | 1              | 2          |         | 4              | 8          |         |
| Others                      | 0              | 1          |         | 13             | 11         |         |
| <b>Stage</b>                |                |            |         |                |            |         |
| I                           |                |            | 0.38    | 77             | 70         | 0.50    |
| II                          |                |            |         | 19             | 26         |         |
| III                         | 2              | 0          |         | 13             | 17         |         |
| IV (M1a)                    | 9              | 9          |         | 6              | 4          |         |
| IV (M1b)                    | 6              | 4          |         |                |            |         |
| IV (M1c)                    | 17             | 22         |         |                |            |         |
| <b>EGFR mutation status</b> |                |            |         |                |            |         |
| Wild type                   | 22             | 22         | 0.76    |                |            |         |
| Mutant                      | 4              | 5          |         |                |            |         |
| <b>KRAS mutation status</b> |                |            |         |                |            |         |
| Wild type                   | 14             | 18         | 0.42    |                |            |         |
| Mutant                      | 10             | 8          |         |                |            |         |
| <b>CNS metastasis</b>       |                |            |         |                |            |         |
| No                          | 28             | 22         | 0.04    |                |            |         |
| Yes                         | 5              | 13         |         |                |            |         |
| <b>Liver metastasis</b>     |                |            |         |                |            |         |
| No                          | 26             | 30         | 0.45    |                |            |         |
| Yes                         | 7              | 5          |         |                |            |         |
| <b>LIPI score</b>           |                |            |         |                |            |         |
| Good                        | 15             | 13         | 0.53    |                |            |         |
| Intermediate                | 10             | 16         |         |                |            |         |
| Poor                        | 2              | 2          |         |                |            |         |

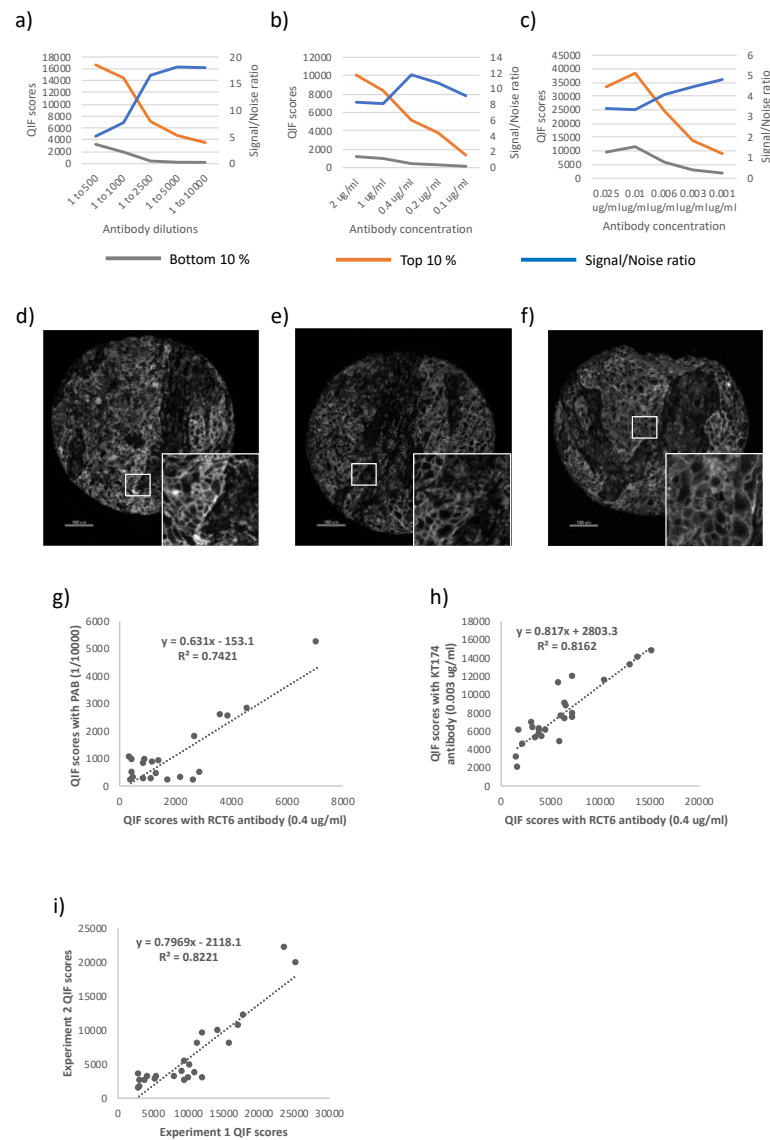

**Supplementary figure S1.** Validation of anti-CMTM6 antibody clone RCT6. (a)-(c) Titration curves of three different anti-CMTM6 antibodies used for assay validation plotted at five different concentrations: polyclonal antibody (ab198284) (a), monoclonal antibody clone RCT6 (b), and monoclonal antibody clone KT174 (c); (d)-(f) Representative membranous CMTM6 staining pattern with anti-CMTM6 polyclonal antibody (ab198284) (d), anti-CMTM6 monoclonal antibody clone RCT6 (e) and anti-CMTM6 monoclonal antibody clone KT174 (f). (g)-(h) Cross validation of anti-CMTM6 antibody clone RCT6 to the anti-CMTM6 polyclonal antibody (ab198284) (g) and to a second anti-CMTM6 monoclonal antibody (clone KT174) targeting non-overlapping epitopes (h). (i) Reproducibility of CMTM6 measurement with clone RCT6 in two independent multiplexed experiments

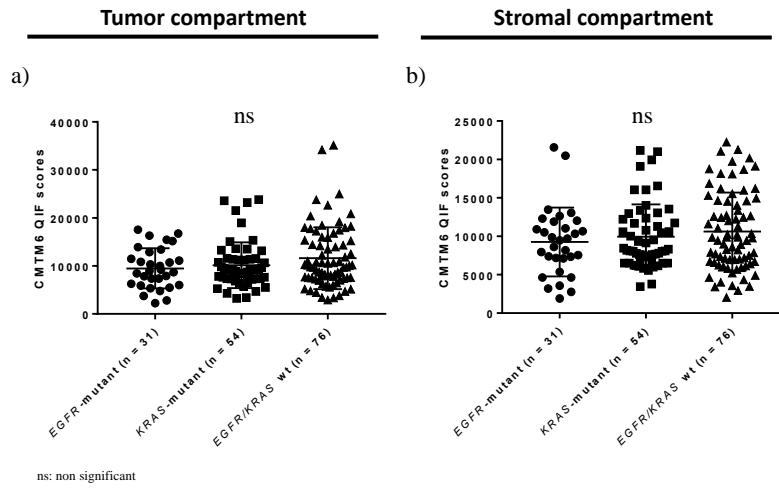

**Supplementary figure S2.** CMTM6 expression levels in the tumor compartment (a) and the stromal compartment (b) in *EGFR*- and *KRAS*-mutant NSCLCs (YTMA310 and YTMA404 cohorts combined)

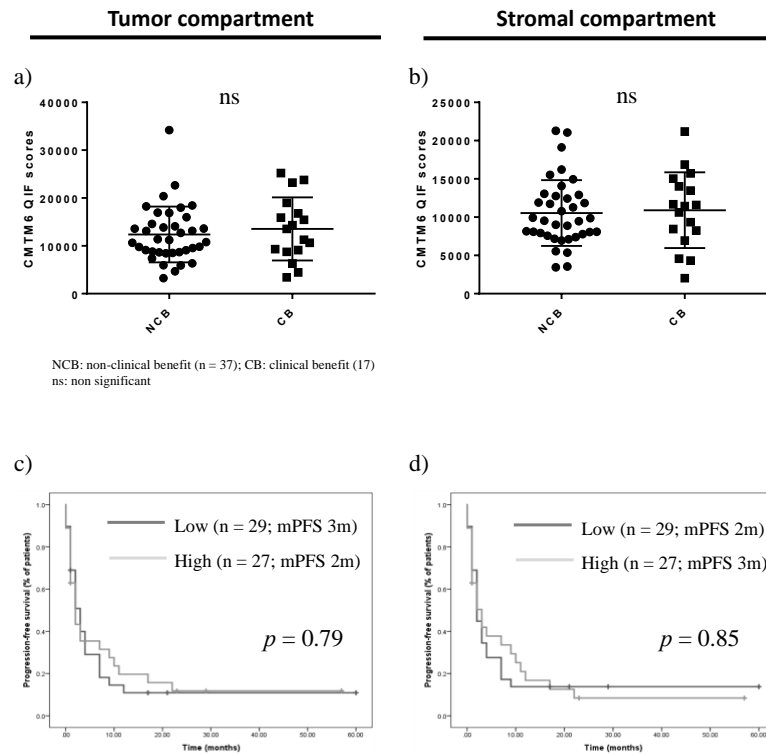

**Supplementary figure S3.** Clinical benefit and PFS under single-agent PD-1 axis blockade according to CMTM6 expression in the tumor compartment (a,c) and the stromal compartment (b,d)



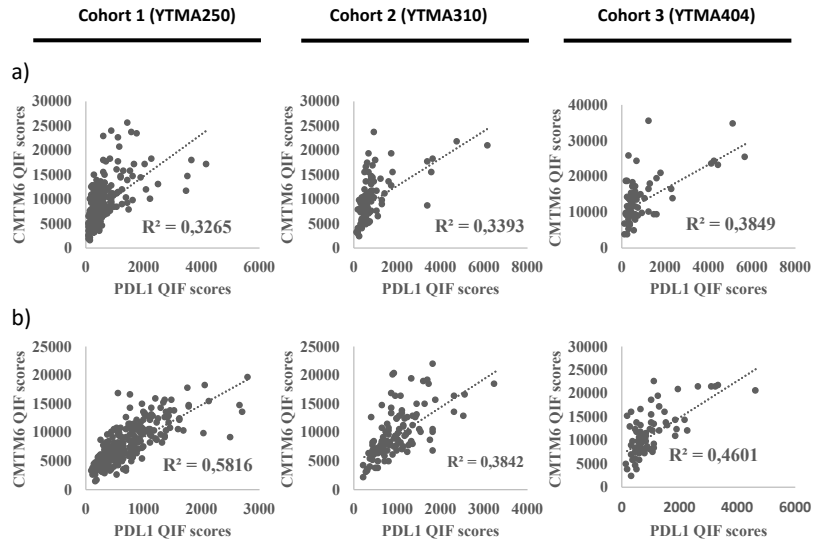

**Supplementary figure S4.** Correlation between CMTM6 and PDL1 expression levels in the tumor compartment (a) and the stromal compartment (b) in the three tested cohorts separately

Immunotherapy treated cohort (YTMA404)

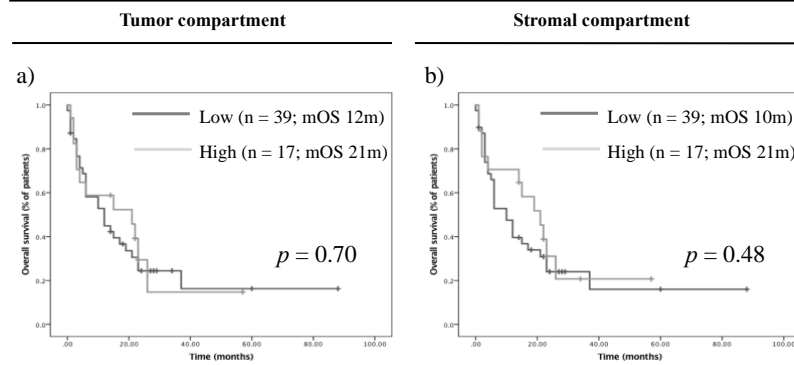

**Supplementary figure S5.** OS under PD-1 axis blockade in patients in the top 30<sup>th</sup> percentile of PD-L1 expression in the tumor compartment (a) and the stromal compartment (b)

DAPI/CMTM6/PD-L1

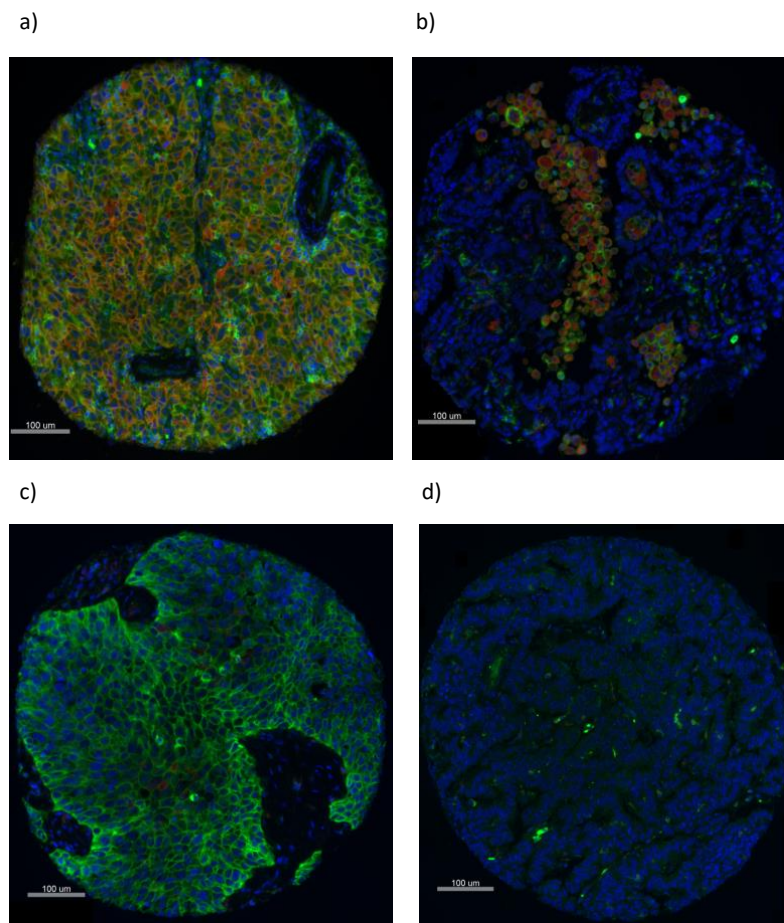

**Supplementary figure S6.** Representative images showing CMTM6 and PD-L1 co-expression phenotypes in NSCLC: (a) CMTM6 high / PD-L1 high; (b) CMTM6 low / PD-L1 high; (c) CMTM6 high / PD-L1 low; (d) CMTM6 low / PD-L1 low

### Immunotherapy treated cohort (YTMA404)

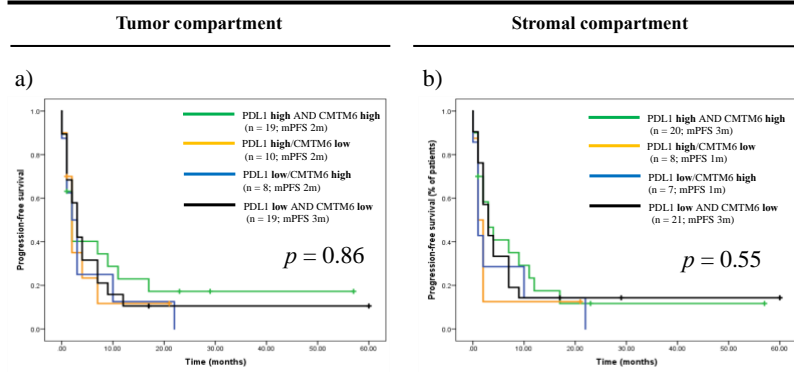

**Supplementary figure S7.** PFS under PD-1 axis blockade in the four CMTM6/PD-L1 co-expression phenotypes

**Immunotherapy treated cohort (YTMA404)**

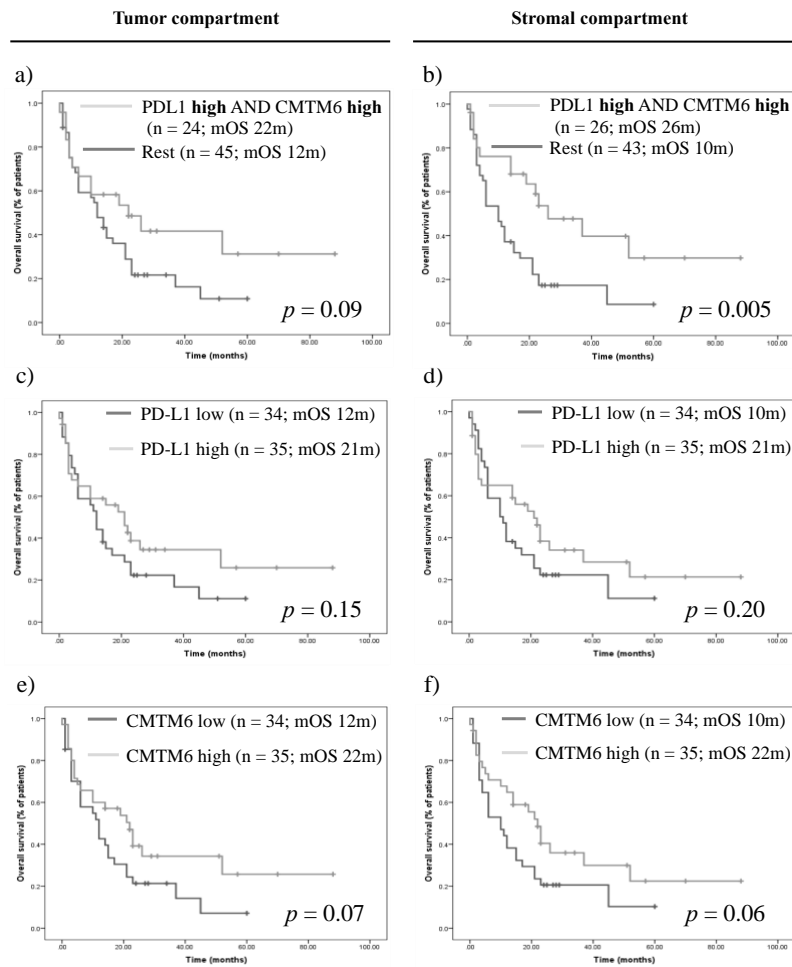

**Supplementary figure S8.** Indicative performance of high CMTM6 and PD-L1 in the full immunotherapy-treated patient cohort (n = 69). (a)-(b) OS in patients with high CMTM6 and PD-L1 co-expression in the tumor compartment (a) and the stromal compartment (b); (c)-(d) OS according to PD-L1 expression in the tumor compartment (c) and the stromal compartment (d); (e)-(f) OS according to CMTM6 expression in the tumor compartment (e) and the stromal compartment (f)

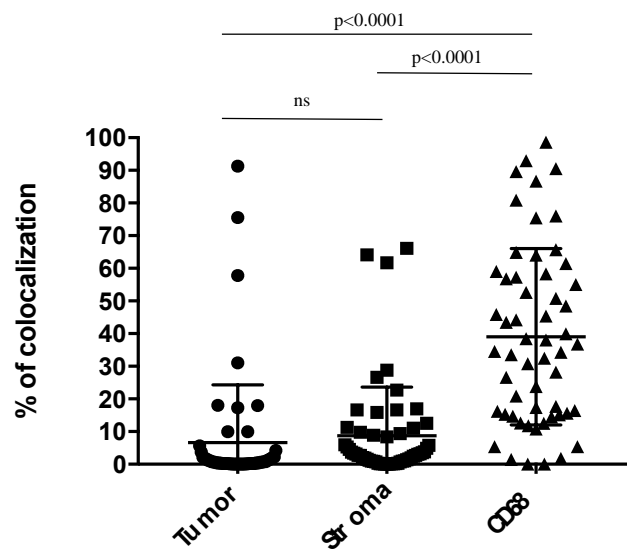

**Supplementary figure S9.** Percentage of CMTM6 and PD-L1 pixel co-localization in the tumor, stroma, and CD68 compartments

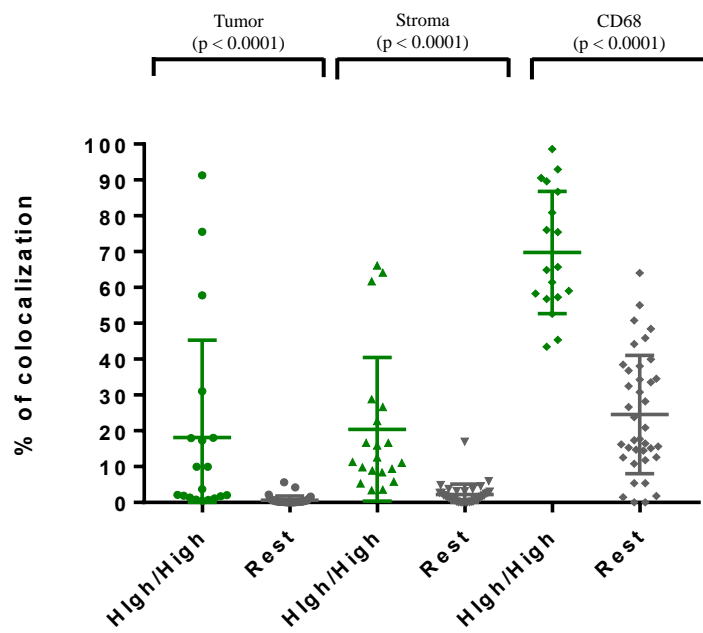

**Supplementary figure S10.** Percentage of CMTM6 and PD-L1 colocalization in the tumor, stroma and CD68 compartments in tumors with high expression of CMTM6 and PD-L1 compared to the rest of the three tumor phenotypes combined
